# Supplementary material for: MicroRNAs‐Proteomic Networks Characterizing Human Medulloblastoma‐SLCs
Source: Hindawi journal article supplement (doi:10.1155/2016/2683042), 2016-01-01
Supplement: f1 [file 2683042.f1.pdf]

**Supplementary Table 1. microRNAs related pathways using mirPath**

| <b>KEGG pathway</b>                                        | <b>P-value</b> | <b>#genes</b> | <b>#microRNAs</b> |
|------------------------------------------------------------|----------------|---------------|-------------------|
| Prostate cancer                                            | 2,91E-16       | 33            | 11                |
| Pathways in cancer                                         | 1,65E-08       | 70            | 15                |
| Colorectal cancer                                          | 2,37E-08       | 22            | 14                |
| Hepatitis B                                                | 5,12E-08       | 41            | 13                |
| Melanoma                                                   | 6,23E-08       | 24            | 11                |
| Bladder cancer                                             | 1,80E-07       | 17            | 8                 |
| Glioma                                                     | 8,89E-07       | 23            | 11                |
| Inositol phosphate metabolism                              | 1,33E-04       | 16            | 7                 |
| Focal adhesion                                             | 1,70E-04       | 37            | 14                |
| Non-small cell lung cancer                                 | 3,88E-04       | 18            | 8                 |
| TGF-beta signaling pathway                                 | 4,60E-04       | 18            | 11                |
| mRNA surveillance pathway                                  | 4,60E-04       | 20            | 10                |
| mTOR signaling pathway                                     | 4,60E-04       | 15            | 8                 |
| Pancreatic secretion                                       | 1,18E-03       | 19            | 8                 |
| Salmonella infection                                       | 1,24E-03       | 18            | 9                 |
| Acute myeloid leukemia                                     | 1,67E-03       | 18            | 11                |
| Cell cycle                                                 | 1,68E-03       | 27            | 12                |
| Cholinergic synapse                                        | 2,18E-03       | 24            | 10                |
| Insulin signaling pathway                                  | 2,69E-03       | 25            | 9                 |
| HIF-1 signaling pathway                                    | 2,98E-03       | 21            | 10                |
| Pancreatic cancer                                          | 3,23E-03       | 22            | 12                |
| VEGF signaling pathway                                     | 3,62E-03       | 14            | 9                 |
| Phosphatidylinositol signaling system                      | 5,03E-03       | 18            | 7                 |
| Hepatitis C                                                | 5,90E-03       | 23            | 10                |
| Epithelial cell signaling in Helicobacter pylori infection | 5,90E-03       | 14            | 7                 |

|                                                           |          |    |    |
|-----------------------------------------------------------|----------|----|----|
| RNA degradation                                           | 6,56E-03 | 15 | 7  |
| Shigellosis                                               | 7,26E-03 | 14 | 8  |
| Salivary secretion                                        | 7,59E-03 | 17 | 7  |
| Chronic myeloid leukemia                                  | 8,05E-03 | 22 | 12 |
| Endometrial cancer                                        | 8,10E-03 | 17 | 10 |
| Melanogenesis                                             | 8,61E-03 | 19 | 8  |
| Gastric acid secretion                                    | 9,72E-03 | 15 | 8  |
| Chemokine signaling pathway                               | 1,05E-02 | 31 | 11 |
| Alzheimer's disease                                       | 1,19E-02 | 28 | 11 |
| PI3K-Akt signaling pathway                                | 1,30E-02 | 64 | 14 |
| Fc epsilon RI signaling pathway                           | 1,33E-02 | 14 | 9  |
| Axon guidance                                             | 1,35E-02 | 23 | 9  |
| Regulation of actin cytoskeleton                          | 1,66E-02 | 36 | 9  |
| Renal cell carcinoma                                      | 1,77E-02 | 15 | 7  |
| Dorso-ventral axis formation                              | 1,77E-02 | 6  | 4  |
| HTLV-I infection                                          | 1,98E-02 | 40 | 16 |
| Serotonergic synapse                                      | 1,98E-02 | 19 | 8  |
| Oocyte meiosis                                            | 2,30E-02 | 22 | 12 |
| T cell receptor signaling pathway                         | 2,35E-02 | 19 | 11 |
| Circadian rhythm                                          | 2,35E-02 | 7  | 5  |
| Adherens junction                                         | 2,48E-02 | 14 | 8  |
| Endocrine and other factor-regulated calcium reabsorption | 2,48E-02 | 11 | 8  |
| Fanconi anemia pathway                                    | 2,66E-02 | 11 | 7  |
| Dopaminergic synapse                                      | 2,74E-02 | 23 | 10 |
| Viral myocarditis                                         | 2,92E-02 | 13 | 10 |
| Pertussis                                                 | 2,92E-02 | 14 | 7  |

|                                           |          |    |    |
|-------------------------------------------|----------|----|----|
| Vasopressin-regulated water reabsorption  | 2,92E-02 | 10 | 5  |
| Neurotrophin signaling pathway            | 3,30E-02 | 27 | 11 |
| NOD-like receptor signaling pathway       | 3,30E-02 | 12 | 5  |
| Progesterone-mediated oocyte maturation   | 4,13E-02 | 15 | 10 |
| Chagas disease (American trypanosomiasis) | 4,39E-02 | 18 | 11 |

**Supplementary Table 2**

| miRTarBase ID | microRNA      | Species (micro RNA) | Target Gene | Target Gene (Entrez ID) | Species (Target Gene) | Experiments                                                                        | Support Type   | References (PMID) |
|---------------|---------------|---------------------|-------------|-------------------------|-----------------------|------------------------------------------------------------------------------------|----------------|-------------------|
| MIRT000417    | hsa-let-7a-5p | Homo sapiens        | MYC         | 4609                    | Homo sapiens          | Western blot                                                                       | Functional MTI | 20033209          |
| MIRT000417    | hsa-let-7a-5p | Homo sapiens        | MYC         | 4609                    | Homo sapiens          | qRT-PCR//Western blot                                                              | Functional MTI | 16651716          |
| MIRT000463    | hsa-let-7a-5p | Homo sapiens        | NKIRAS2     | 28511                   | Homo sapiens          | ELISA//qRT-PCR//Luciferase reporter assay//Western blot                            | Functional MTI | 20351193          |
| MIRT000708    | hsa-let-7a-5p | Homo sapiens        | ITGB3       | 3690                    | Homo sapiens          | qRT-PCR//Luciferase reporter assay//Western blot                                   | Functional MTI | 18679415          |
| MIRT001853    | hsa-let-7a-5p | Homo sapiens        | NF2         | 4771                    | Homo sapiens          | Luciferase reporter assay//Microarray//qRT-PCR//Western blot//Reporter assay;Other | Functional MTI | 17220301          |
| MIRT001854    | hsa-let-7a-5p | Homo sapiens        | NRAS        | 4893                    | Homo sapiens          | Western blot                                                                       | Functional MTI | 19110058          |
| MIRT001854    | hsa-let-7a-5p | Homo sapiens        | NRAS        | 4893                    | Homo sapiens          | Luciferase reporter assay//Microarray                                              | Functional MTI | 15766527          |
| MIRT001855    | hsa-let-7a-5p | Homo sapiens        | KRAS        | 3845                    | Homo sapiens          | Luciferase reporter assay//Microarray                                              | Functional MTI | 15766527          |
| MIRT001855    | hsa-let-7a-5p | Homo sapiens        | KRAS        | 3845                    | Homo sapiens          | Western blot                                                                       | Functional MTI | 20033209          |
| MIRT001855    | hsa-let-7a-5p | Homo sapiens        | KRAS        | 3845                    | Homo sapiens          | qRT-PCR//Western blot                                                              | Functional MTI | 16651716          |
| MIRT001936    | hsa-let-7a-5p | Homo sapiens        | PRDM1       | 639                     | Homo sapiens          | Luciferase reporter assay                                                          | Functional MTI | 18583325          |
| MIRT001936    | hsa-let-7a-5p | Homo sapiens        | PRDM1       | 639                     | Homo sapiens          | Immunohistochemistry//Luciferase reporter assay//qRT-PCR//Western blot             | Functional MTI | 20651244          |
| MIRT002077    | hsa-let-7a-5p | Homo sapiens        | TRIM71      | 131405                  | Homo sapiens          | Luciferase reporter assay//Reporter assay                                          | Functional MTI | 17890240          |
| MIRT002077    | hsa-let-7a-5p | Homo sapiens        | TRIM71      | 131405                  | Homo sapiens          | Luciferase reporter assay                                                          | Functional MTI | 18829576          |
| MIRT002305    | hsa-let-7a-5p | Homo sapiens        | RAVER2      | 55225                   | Homo sapiens          | Immunoprecipitation//Luciferase reporter assay//Western blot                       | Functional MTI | 17637574          |
| MIRT002323    | hsa-let-7a-5p | Homo sapiens        | HMGA2       | 8091                    | Homo sapiens          | qRT-PCR//Western blot//Luciferase reporter assay                                   | Functional MTI | 17600087          |
| MIRT002323    | hsa-let-7a-5p | Homo sapiens        | HMGA2       | 8091                    | Homo sapiens          | Luciferase reporter assay                                                          | Functional MTI | 18083101          |
| MIRT002323    | hsa-let-7a-5p | Homo sapiens        | HMGA2       | 8091                    | Homo sapiens          | Luciferase reporter assay                                                          | Functional MTI | 17322030          |
| MIRT002323    | hsa-let-7a-5p | Homo sapiens        | HMGA2       | 8091                    | Homo sapiens          | Luciferase reporter assay                                                          | Functional MTI | 18413822          |
| MIRT002323    | hsa-let-7a-5p | Homo sapiens        | HMGA2       | 8091                    | Homo sapiens          | Luciferase reporter assay//Western blot//qRT-PCR                                   | Functional MTI | 19179606          |
| MIRT003152    | hsa-let-7a-5p | Homo sapiens        | HMGA1       | 3159                    | Homo sapiens          | Luciferase reporter assay//qRT-PCR                                                 | Functional MTI | 19179606          |
| MIRT003522    | hsa-let-7a-5p | Homo sapiens        | AGO4        | 192670                  | Homo sapiens          | Luciferase reporter assay                                                          | Functional MTI | 20144220          |

|            |                 |              |         |        |              |                                                                                                                                      |                           |          |
|------------|-----------------|--------------|---------|--------|--------------|--------------------------------------------------------------------------------------------------------------------------------------|---------------------------|----------|
| MIRT004321 | hsa-let-7a-5p   | Homo sapiens | UHRF 2  | 115426 | Homo sapiens | qRT-PCR//Western blot/Luciferase reporter assay                                                                                      | Functional MTI            | 19818775 |
| MIRT004346 | hsa-let-7a-5p   | Homo sapiens | DICER 1 | 23405  | Homo sapiens | Luciferase reporter assay//Western blot//Northern blot                                                                               | Functional MTI            | 18700235 |
| MIRT004471 | hsa-let-7a-5p   | Homo sapiens | HRAS    | 3265   | Homo sapiens | Luciferase reporter assay                                                                                                            | Functional MTI            | 18083101 |
| MIRT004520 | hsa-let-7a-5p   | Homo sapiens | IGF2    | 3481   | Homo sapiens | Luciferase reporter assay                                                                                                            | Functional MTI            | 17974952 |
| MIRT004801 | hsa-let-7a-5p   | Homo sapiens | LIN28 A | 79727  | Homo sapiens | B-globin reporter assay//Luciferase reporter assay//Microarray                                                                       | Functional MTI            | 16495412 |
| MIRT005292 | hsa-let-7a-5p   | Homo sapiens | CASP3   | 836    | Homo sapiens | Luciferase reporter assay//Western blot                                                                                              | Functional MTI            | 18758960 |
| MIRT005420 | hsa-let-7a-5p   | Homo sapiens | IL6     | 3569   | Homo sapiens | Luciferase reporter assay//qRT-PCR//Western blot                                                                                     | Functional MTI            | 19878981 |
| MIRT005477 | hsa-let-7a-5p   | Homo sapiens | E2F2    | 1870   | Homo sapiens | Luciferase reporter assay//qRT-PCR//Western blot                                                                                     | Functional MTI            | 20418948 |
| MIRT005478 | hsa-let-7a-5p   | Homo sapiens | CCND 2  | 894    | Homo sapiens | Luciferase reporter assay//qRT-PCR//Western blot                                                                                     | Functional MTI            | 20418948 |
| MIRT032506 | hsa-let-7a-5p   | Homo sapiens | CDKN 1A | 1026   | Homo sapiens | Western blot                                                                                                                         | Functional MTI            | 19818775 |
| MIRT035534 | hsa-let-7a-5p   | Homo sapiens | HAS2    | 3037   | Homo sapiens | Luciferase reporter assay                                                                                                            | Functional MTI            | 22871741 |
| MIRT035541 | hsa-let-7a-5p   | Homo sapiens | EGFR    | 1956   | Homo sapiens | Luciferase reporter assay                                                                                                            | Functional MTI            | 23032975 |
| MIRT003596 | hsa-miR-135b-5p | Homo sapiens | BGLA P  | 632    | Homo sapiens | qRT-PCR                                                                                                                              | Non-Functional (Weak) MTI | 19795981 |
| MIRT003597 | hsa-miR-135b-5p | Homo sapiens | RUNX 2  | 860    | Homo sapiens | qRT-PCR                                                                                                                              | Non-Functional (Weak) MTI | 19795981 |
| MIRT005440 | hsa-miR-135b-5p | Homo sapiens | KLF4    | 9314   | Homo sapiens | Luciferase reporter assay//Microarray//qRT-PCR                                                                                       | Functional MTI            | 20981674 |
| MIRT005442 | hsa-miR-135b-5p | Homo sapiens | MAFB    | 9935   | Homo sapiens | Luciferase reporter assay//Microarray//qRT-PCR                                                                                       | Functional MTI            | 20981674 |
| MIRT007298 | hsa-miR-135b-5p | Homo sapiens | CASR    | 846    | Homo sapiens | Western blot                                                                                                                         | Functional MTI            | 23340180 |
| MIRT000305 | hsa-miR-145-5p  | Homo sapiens | BNIP3   | 664    | Homo sapiens | Luciferase reporter assay//qRT-PCR//Western blot                                                                                     | Functional MTI            | 20332243 |
| MIRT000307 | hsa-miR-145-5p  | Homo sapiens | SOX2    | 6657   | Homo sapiens | FACS//Flow//GFP reporter assay//In situ hybridization//Luciferase reporter assay//qRT-PCR//Reporter assay;Western blot;qRT-PCR;Other | Functional MTI            | 19409607 |
| MIRT000307 | hsa-miR-145-5p  | Homo sapiens | SOX2    | 6657   | Homo sapiens | Luciferase reporter assay                                                                                                            | Functional MTI            | 23541921 |
| MIRT000308 | hsa-miR-145-5p  | Homo sapiens | KLF4    | 9314   | Homo sapiens | FACS//Flow//GFP reporter assay//In situ hybridization//Luciferase reporter assay//qRT-PCR//Reporter assay;Western blot;qRT-PCR       | Functional MTI            | 19409607 |
| MIRT000426 | hsa-miR-145-5p  | Homo sapiens | MUC1    | 4582   | Homo sapiens | Luciferase reporter assay//Western blot                                                                                              | Functional MTI            | 20407606 |
| MIRT000426 | hsa-miR-145-5p  | Homo sapiens | MUC1    | 4582   | Homo sapiens | Immunohistochemistry//Luciferase reporter assay//qRT-PCR//Western blot//Reporter assay                                               | Functional MTI            | 19996288 |

|            |                |              |        |      |              |                                                                                                                             |                |          |
|------------|----------------|--------------|--------|------|--------------|-----------------------------------------------------------------------------------------------------------------------------|----------------|----------|
| MIRT000457 | hsa-miR-145-5p | Homo sapiens | MYO6   | 4646 | Homo sapiens | qRT-PCR//Luciferase reporter assay//Western blot                                                                            | Functional MTI | 20353999 |
| MIRT006494 | hsa-miR-145-5p | Homo sapiens | ITGB8  | 3696 | Homo sapiens | Immunofluorescence//Luciferase reporter assay//qRT-PCR//GFP reporter assay//In situ hybridization//Microarray//Western blot | Functional MTI | 21701675 |
| MIRT000626 | hsa-miR-145-5p | Homo sapiens | STAT1  | 6772 | Homo sapiens | qRT-PCR//Luciferase reporter assay//Western blot//Microarray                                                                | Functional MTI | 20098684 |
| MIRT000627 | hsa-miR-145-5p | Homo sapiens | YES1   | 7525 | Homo sapiens | qRT-PCR//Luciferase reporter assay//Western blot//Microarray                                                                | Functional MTI | 20098684 |
| MIRT000627 | hsa-miR-145-5p | Homo sapiens | YES1   | 7525 | Homo sapiens | Reporter assay;Microarray                                                                                                   | Functional MTI | 21351259 |
| MIRT000676 | hsa-miR-145-5p | Homo sapiens | CBFB   | 865  | Homo sapiens | qRT-PCR//Luciferase reporter assay//Microarray//Reporter assay;Other                                                        | Functional MTI | 19915607 |
| MIRT000677 | hsa-miR-145-5p | Homo sapiens | PPP3CA | 5530 | Homo sapiens | qRT-PCR//Luciferase reporter assay//Microarray//Reporter assay;Other                                                        | Functional MTI | 19915607 |
| MIRT000678 | hsa-miR-145-5p | Homo sapiens | CLINT1 | 9685 | Homo sapiens | qRT-PCR//Luciferase reporter assay//Microarray//Reporter assay;Other                                                        | Functional MTI | 19915607 |
| MIRT000731 | hsa-miR-145-5p | Homo sapiens | IRS1   | 3667 | Homo sapiens | Luciferase reporter assay//Northern blot//qRT-PCR//Western blot//Reporter assay;Other                                       | Functional MTI | 17827156 |
| MIRT000731 | hsa-miR-145-5p | Homo sapiens | IRS1   | 3667 | Homo sapiens | qRT-PCR//Western blot                                                                                                       | Functional MTI | 19391107 |
| MIRT000731 | hsa-miR-145-5p | Homo sapiens | IRS1   | 3667 | Homo sapiens | Luciferase reporter assay                                                                                                   | Functional MTI | 22431718 |
| MIRT000731 | hsa-miR-145-5p | Homo sapiens | IRS1   | 3667 | Homo sapiens | Luciferase reporter assay//Western blot                                                                                     | Functional MTI | 23201159 |
| MIRT000732 | hsa-miR-145-5p | Homo sapiens |        |      | Homo sapiens | Luciferase reporter assay                                                                                                   | Functional MTI | 15131085 |
| MIRT006332 | hsa-miR-145-5p | Homo sapiens | IRS2   | 8660 | Homo sapiens | Luciferase reporter assay                                                                                                   | Functional MTI | 22431718 |
| MIRT006215 | hsa-miR-145-5p | Homo sapiens | VEGFA  | 7422 | Homo sapiens | Luciferase reporter assay//qRT-PCR//Western blot                                                                            | Functional MTI | 22472569 |
| MIRT003543 | hsa-miR-145-5p | Homo sapiens | FSCN1  | 6624 | Homo sapiens | Luciferase reporter assay//qRT-PCR//Western blot                                                                            | Functional MTI | 20160723 |
| MIRT003543 | hsa-miR-145-5p | Homo sapiens | FSCN1  | 6624 | Homo sapiens | Luciferase reporter assay//Microarray//qRT-PCR//Western blot//Reporter assay;Western blot;qRT-PCR;Microarray                | Functional MTI | 21351259 |
| MIRT003543 | hsa-miR-145-5p | Homo sapiens | FSCN1  | 6624 | Homo sapiens | Luciferase reporter assay//qRT-PCR//Western blot//Reporter assay                                                            | Functional MTI | 20198616 |
| MIRT003543 | hsa-miR-145-5p | Homo sapiens | FSCN1  | 6624 | Homo sapiens | Reporter assay                                                                                                              | Functional MTI | 21258769 |
| MIRT004290 | hsa-miR-145-5p | Homo sapiens | MYC    | 4609 | Homo sapiens | qRT-PCR//Luciferase reporter assay//Western blot                                                                            | Functional MTI | 19202062 |
| MIRT004290 | hsa-miR-145-5p | Homo sapiens | MYC    | 4609 | Homo sapiens | Luciferase reporter assay//qRT-PCR//Western blot                                                                            | Functional MTI | 21092188 |
| MIRT004496 | hsa-miR-145-5p | Homo sapiens | FLI1   | 2313 | Homo sapiens | qRT-PCR//Luciferase reporter assay//Western blot                                                                            | Functional MTI | 20382729 |
| MIRT004496 | hsa-miR-145-5p | Homo sapiens | FLI1   | 2313 | Homo sapiens | Luciferase reporter assay//Northern blot//qRT-PCR//Western blot                                                             | Functional MTI | 20737575 |
| MIRT004496 | hsa-miR-       | Homo         | FLI1   | 2313 | Homo         | Luciferase reporter assay//Western blot                                                                                     | Functional MTI | 21217773 |

|            |                |              |           |        |              |                                                                                                                                |                           |          |
|------------|----------------|--------------|-----------|--------|--------------|--------------------------------------------------------------------------------------------------------------------------------|---------------------------|----------|
|            | 145-5p         | sapiens      |           |        | sapiens      |                                                                                                                                |                           |          |
| MIRT004580 | hsa-miR-145-5p | Homo sapiens |           |        | Homo sapiens | Luciferase reporter assay//qRT-PCR//Western blot                                                                               | Functional MTI            | 20687965 |
| MIRT004616 | hsa-miR-145-5p | Homo sapiens | IFNB1     | 3456   | Homo sapiens | ELISA//Luciferase reporter assay//qRT-PCR                                                                                      | Functional MTI            | 20130213 |
| MIRT004748 | hsa-miR-145-5p | Homo sapiens | TIRAP     | 114609 | Homo sapiens | Immunoprecipitaion//Western blot//Communoprecipitaion                                                                          | Functional MTI            | 19898489 |
| MIRT004904 | hsa-miR-145-5p | Homo sapiens | POU5F1    | 5460   | Homo sapiens | FACS//Flow//GFP reporter assay//In situ hybridization//Luciferase reporter assay//qRT-PCR//Reporter assay;Western blot;qRT-PCR | Functional MTI            | 19409607 |
| MIRT004904 | hsa-miR-145-5p | Homo sapiens | POU5F1    | 5460   | Homo sapiens | Luciferase reporter assay                                                                                                      | Functional MTI            | 21496429 |
| MIRT004904 | hsa-miR-145-5p | Homo sapiens | POU5F1    | 5460   | Homo sapiens | Luciferase reporter assay                                                                                                      | Functional MTI            | 23541921 |
| MIRT004931 | hsa-miR-145-5p | Homo sapiens | IGF1R     | 3480   | Homo sapiens | qRT-PCR//Western blot                                                                                                          | Functional MTI            | 19391107 |
| MIRT004938 | hsa-miR-145-5p | Homo sapiens | KRT7      | 3855   | Homo sapiens | Immunoblot//qRT-PCR                                                                                                            | Non-Functional MTI (Weak) | 19378336 |
| MIRT005809 | hsa-miR-145-5p | Homo sapiens | ROBO2     | 6092   | Homo sapiens | In situ hybridization//Luciferase reporter assay//qRT-PCR//western blot//Reporter assay                                        | Functional MTI            | 21276775 |
| MIRT005810 | hsa-miR-145-5p | Homo sapiens | SRGA P1   | 57522  | Homo sapiens | In situ hybridization//Luciferase reporter assay//qRT-PCR//western blot                                                        | Functional MTI            | 21276775 |
| MIRT005878 | hsa-miR-145-5p | Homo sapiens | EIF4E     | 1977   | Homo sapiens | Luciferase reporter assay//qRT-PCR//Western blot                                                                               | Functional MTI            | 21092188 |
| MIRT005879 | hsa-miR-145-5p | Homo sapiens | CDK4      | 1019   | Homo sapiens | Luciferase reporter assay//qRT-PCR//Western blot                                                                               | Functional MTI            | 21092188 |
| MIRT006317 | hsa-miR-145-5p | Homo sapiens | SERP1 NE1 | 5054   | Homo sapiens | Immunoblot//Luciferase reporter assay//qRT-PCR//Western blot                                                                   | Functional MTI            | 22108519 |
| MIRT006747 | hsa-miR-145-5p | Homo sapiens | SWAP70    | 23075  | Homo sapiens | Reporter assay;Microarray                                                                                                      | Functional MTI            | 21351259 |
| MIRT006747 | hsa-miR-145-5p | Homo sapiens | SWAP70    | 23075  | Homo sapiens | Reporter assay;Western blot;qRT-PCR                                                                                            | Functional MTI            | 21360565 |
| MIRT006889 | hsa-miR-145-5p | Homo sapiens | NEDD9     | 4739   | Homo sapiens | Immunofluorescence//Immunohistochemistry//qRT-PCR//Western blot                                                                | Functional MTI            | 22869051 |
| MIRT006889 | hsa-miR-145-5p | Homo sapiens | NEDD9     | 4739   | Homo sapiens | Luciferase reporter assay                                                                                                      | Functional MTI            | 23355420 |
| MIRT006899 | hsa-miR-145-5p | Homo sapiens | PAK4      | 10298  | Homo sapiens | Luciferase reporter assay//qRT-PCR//Western blot                                                                               | Functional MTI            | 22766504 |
| MIRT006903 | hsa-miR-145-5p | Homo sapiens | DDX17     | 10521  | Homo sapiens | Luciferase reporter assay//Northern blot//qRT-PCR//Western blot                                                                | Functional MTI            | 22876303 |
| MIRT007094 | hsa-miR-145-5p | Homo sapiens | ERG       | 2078   | Homo sapiens | Luciferase reporter assay                                                                                                      | Functional MTI            | 23480797 |
| MIRT007107 | hsa-miR-145-5p | Homo sapiens | NRAS      | 4893   | Homo sapiens | Luciferase reporter assay//Western blot                                                                                        | Functional MTI            | 23201159 |
| MIRT007180 | hsa-miR-145-5p | Homo sapiens | ILK       | 3611   | Homo sapiens | Luciferase reporter assay//qRT-PCR//Western blot                                                                               | Functional MTI            | 23104321 |
| MIRT007247 | hsa-miR-145-5p | Homo sapiens | CTGF      | 1490   | Homo sapiens | Luciferase reporter assay                                                                                                      | Functional MTI            | 23390502 |

|            |                |              |          |        |              |                                           |                |          |
|------------|----------------|--------------|----------|--------|--------------|-------------------------------------------|----------------|----------|
| MIRT007248 | hsa-miR-145-5p | Homo sapiens | SOCS7    | 30837  | Homo sapiens | Luciferase reporter assay                 | Functional MTI | 23392170 |
| MIRT007257 | hsa-miR-145-5p | Homo sapiens | MDM2     | 4193   | Homo sapiens | Luciferase reporter assay                 | Functional MTI | 22330136 |
| MIRT007275 | hsa-miR-145-5p | Homo sapiens | ADAM17   | 6868   | Homo sapiens | Luciferase reporter assay                 | Functional MTI | 23441135 |
| MIRT007288 | hsa-miR-145-5p | Homo sapiens | CDH2     | 1000   | Homo sapiens | Luciferase reporter assay//Western blot   | Functional MTI | 22370644 |
| MIRT007307 | hsa-miR-145-5p | Homo sapiens | HDAC2    | 3066   | Homo sapiens | Luciferase reporter assay                 | Functional MTI | 23499894 |
| MIRT021499 | hsa-miR-145-5p | Homo sapiens | RTKN     | 6242   | Homo sapiens | Reporter assay;Western blot;qRT-PCR;Other | Functional MTI | 19360360 |
| MIRT021501 | hsa-miR-145-5p | Homo sapiens | F11R     | 50848  | Homo sapiens | Reporter assay                            | Functional MTI | 20818426 |
| MIRT021501 | hsa-miR-145-5p | Homo sapiens | F11R     | 50848  | Homo sapiens | Reporter assay;Microarray                 | Functional MTI | 21351259 |
| MIRT021502 | hsa-miR-145-5p | Homo sapiens | ARL6IP5  | 10550  | Homo sapiens | Reporter assay;Microarray                 | Functional MTI | 21351259 |
| MIRT021503 | hsa-miR-145-5p | Homo sapiens | AKR1B10  | 57016  | Homo sapiens | Reporter assay;Microarray                 | Functional MTI | 21351259 |
| MIRT021504 | hsa-miR-145-5p | Homo sapiens | C11orf65 | 160140 | Homo sapiens | Reporter assay;Microarray                 | Functional MTI | 21351259 |
| MIRT021505 | hsa-miR-145-5p | Homo sapiens | HLTF     | 6596   | Homo sapiens | Reporter assay;Microarray                 | Functional MTI | 21351259 |
| MIRT021506 | hsa-miR-145-5p | Homo sapiens | GMFB     | 2764   | Homo sapiens | Reporter assay;Microarray                 | Functional MTI | 21351259 |
| MIRT021507 | hsa-miR-145-5p | Homo sapiens | SERINC5  | 256987 | Homo sapiens | Reporter assay;Microarray                 | Functional MTI | 21351259 |
| MIRT021508 | hsa-miR-145-5p | Homo sapiens | MEST     | 4232   | Homo sapiens | Reporter assay;Microarray                 | Functional MTI | 21351259 |
| MIRT021509 | hsa-miR-145-5p | Homo sapiens | ALPPL2   | 251    | Homo sapiens | Reporter assay;Microarray                 | Functional MTI | 21351259 |
| MIRT021510 | hsa-miR-145-5p | Homo sapiens | NDRG2    | 57447  | Homo sapiens | Reporter assay;Microarray                 | Functional MTI | 21351259 |
| MIRT021511 | hsa-miR-145-5p | Homo sapiens | DTD1     | 92675  | Homo sapiens | Reporter assay;Microarray                 | Functional MTI | 21351259 |
| MIRT021512 | hsa-miR-145-5p | Homo sapiens | TPM3     | 7170   | Homo sapiens | Reporter assay;Microarray                 | Functional MTI | 21351259 |
| MIRT021513 | hsa-miR-145-5p | Homo sapiens | MAP2K6   | 5608   | Homo sapiens | Reporter assay;Microarray                 | Functional MTI | 21351259 |
| MIRT021514 | hsa-miR-145-5p | Homo sapiens | CEP19    | 84984  | Homo sapiens | Reporter assay;Microarray                 | Functional MTI | 21351259 |
| MIRT021515 | hsa-miR-145-5p | Homo sapiens | TPRG1    | 285386 | Homo sapiens | Reporter assay;Microarray                 | Functional MTI | 21351259 |
| MIRT021516 | hsa-miR-145-5p | Homo sapiens | GOLM1    | 51280  | Homo sapiens | Reporter assay;Microarray                 | Functional MTI | 21351259 |
| MIRT021517 | hsa-miR-145-5p | Homo sapiens | CCDC43   | 124808 | Homo sapiens | Reporter assay;Microarray                 | Functional MTI | 21351259 |



|            |                |              |          |        |              |                           |                |          |
|------------|----------------|--------------|----------|--------|--------------|---------------------------|----------------|----------|
| MIRT021518 | hsa-miR-145-5p | Homo sapiens | MMP1     | 4312   | Homo sapiens | Reporter assay;Microarray | Functional MTI | 21351259 |
| MIRT021519 | hsa-miR-145-5p | Homo sapiens | PTP4A2   | 8073   | Homo sapiens | Reporter assay;Microarray | Functional MTI | 21351259 |
| MIRT021520 | hsa-miR-145-5p | Homo sapiens | TMEM9B   | 56674  | Homo sapiens | Reporter assay;Microarray | Functional MTI | 21351259 |
| MIRT021521 | hsa-miR-145-5p | Homo sapiens | MMP12    | 4321   | Homo sapiens | Reporter assay;Microarray | Functional MTI | 21351259 |
| MIRT021522 | hsa-miR-145-5p | Homo sapiens | MTMR14   | 64419  | Homo sapiens | Reporter assay;Microarray | Functional MTI | 21351259 |
| MIRT021523 | hsa-miR-145-5p | Homo sapiens | ALDH3A1  | 218    | Homo sapiens | Reporter assay;Microarray | Functional MTI | 21351259 |
| MIRT021524 | hsa-miR-145-5p | Homo sapiens | NDUF A4  | 4697   | Homo sapiens | Reporter assay;Microarray | Functional MTI | 21351259 |
| MIRT021525 | hsa-miR-145-5p | Homo sapiens | FAM3C    | 10447  | Homo sapiens | Reporter assay;Microarray | Functional MTI | 21351259 |
| MIRT021526 | hsa-miR-145-5p | Homo sapiens | LYPLA2   | 11313  | Homo sapiens | Reporter assay;Microarray | Functional MTI | 21351259 |
| MIRT021527 | hsa-miR-145-5p | Homo sapiens | FAM45A   | 404636 | Homo sapiens | Reporter assay;Microarray | Functional MTI | 21351259 |
| MIRT021528 | hsa-miR-145-5p | Homo sapiens | PIGF     | 5281   | Homo sapiens | Reporter assay;Microarray | Functional MTI | 21351259 |
| MIRT021529 | hsa-miR-145-5p | Homo sapiens | AP1G1    | 164    | Homo sapiens | Reporter assay;Microarray | Functional MTI | 21351259 |
| MIRT021530 | hsa-miR-145-5p | Homo sapiens | PHF17    | 79960  | Homo sapiens | Reporter assay;Microarray | Functional MTI | 21351259 |
| MIRT021531 | hsa-miR-145-5p | Homo sapiens | NIPSNAP1 | 8508   | Homo sapiens | Reporter assay;Microarray | Functional MTI | 21351259 |
| MIRT021532 | hsa-miR-145-5p | Homo sapiens | KREMEN1  | 83999  | Homo sapiens | Reporter assay;Microarray | Functional MTI | 21351259 |
| MIRT021533 | hsa-miR-145-5p | Homo sapiens | MMP14    | 4323   | Homo sapiens | Reporter assay;Microarray | Functional MTI | 21351259 |
| MIRT021534 | hsa-miR-145-5p | Homo sapiens | ABRACL   | 58527  | Homo sapiens | Reporter assay;Microarray | Functional MTI | 21351259 |
| MIRT021535 | hsa-miR-145-5p | Homo sapiens | MIXL1    | 83881  | Homo sapiens | Reporter assay;Microarray | Functional MTI | 21351259 |
| MIRT021536 | hsa-miR-145-5p | Homo sapiens | TSPAN6   | 7105   | Homo sapiens | Reporter assay;Microarray | Functional MTI | 21351259 |
| MIRT021537 | hsa-miR-145-5p | Homo sapiens | PODXL    | 5420   | Homo sapiens | Reporter assay;Microarray | Functional MTI | 21351259 |
| MIRT021538 | hsa-miR-145-5p | Homo sapiens | APH1A    | 51107  | Homo sapiens | Reporter assay;Microarray | Functional MTI | 21351259 |
| MIRT021539 | hsa-miR-145-5p | Homo sapiens | ABHD17C  | 58489  | Homo sapiens | Reporter assay;Microarray | Functional MTI | 21351259 |
| MIRT035522 | hsa-miR-145-5p | Homo sapiens | NANOG    | 79923  | Homo sapiens | Luciferase reporter assay | Functional MTI | 23541921 |
| MIRT035535 | hsa-miR-145-5p | Homo sapiens | MYO5A    | 4644   | Homo sapiens | Luciferase reporter assay | Functional MTI | 22895360 |

|            |                |              |         |       |              |                                                                      |                |          |
|------------|----------------|--------------|---------|-------|--------------|----------------------------------------------------------------------|----------------|----------|
| MIRT000280 | hsa-miR-15a-5p | Homo sapiens | BMI1    | 648   | Homo sapiens | Luciferase reporter assay//Western blot                              | Functional MTI | 19903841 |
| MIRT000282 | hsa-miR-15a-5p | Homo sapiens | WNT3 A  | 89780 | Homo sapiens | Luciferase reporter assay                                            | Functional MTI | 18931683 |
| MIRT000283 | hsa-miR-15a-5p | Homo sapiens | MYB     | 4602  | Homo sapiens | Luciferase reporter assay//Western blot                              | Functional MTI | 18818396 |
| MIRT000283 | hsa-miR-15a-5p | Homo sapiens | MYB     | 4602  | Homo sapiens | Luciferase reporter assay//Microarray//qRT-PCR                       | Functional MTI | 21205891 |
| MIRT000284 | hsa-miR-15a-5p | Homo sapiens | CDC25 A | 993   | Homo sapiens | Luciferase reporter assay                                            | Functional MTI | 18949056 |
| MIRT000285 | hsa-miR-15a-5p | Homo sapiens | CCND 2  | 894   | Homo sapiens | Luciferase reporter assay                                            | Functional MTI | 19549910 |
| MIRT000815 | hsa-miR-15a-5p | Homo sapiens | BCL2    | 596   | Homo sapiens | Luciferase reporter assay                                            | Functional MTI | 17707831 |
| MIRT000815 | hsa-miR-15a-5p | Homo sapiens | BCL2    | 596   | Homo sapiens | Luciferase reporter assay                                            | Functional MTI | 19478946 |
| MIRT000815 | hsa-miR-15a-5p | Homo sapiens | BCL2    | 596   | Homo sapiens | Western blot                                                         | Functional MTI | 20876285 |
| MIRT000815 | hsa-miR-15a-5p | Homo sapiens | BCL2    | 596   | Homo sapiens | Luciferase reporter assay//qRT-PCR//Western blot                     | Functional MTI | 16166262 |
| MIRT000815 | hsa-miR-15a-5p | Homo sapiens | BCL2    | 596   | Homo sapiens | Western blot                                                         | Functional MTI | 19903841 |
| MIRT001227 | hsa-miR-15a-5p | Homo sapiens | CCND 1  | 595   | Homo sapiens | qRT-PCR//Luciferase reporter assay//Western blot                     | Functional MTI | 19591824 |
| MIRT001227 | hsa-miR-15a-5p | Homo sapiens | CCND 1  | 595   | Homo sapiens | Luciferase reporter assay                                            | Functional MTI | 19549910 |
| MIRT001227 | hsa-miR-15a-5p | Homo sapiens | CCND 1  | 595   | Homo sapiens | Luciferase reporter assay                                            | Functional MTI | 18931683 |
| MIRT001228 | hsa-miR-15a-5p | Homo sapiens | CCNE 1  | 898   | Homo sapiens | qRT-PCR//Luciferase reporter assay//Western blot                     | Functional MTI | 19591824 |
| MIRT001228 | hsa-miR-15a-5p | Homo sapiens | CCNE 1  | 898   | Homo sapiens | Luciferase reporter assay                                            | Functional MTI | 19549910 |
| MIRT001228 | hsa-miR-15a-5p | Homo sapiens | CCNE 1  | 898   | Homo sapiens | immunohistochemistry//Luciferase reporter assay//Microarray//qRT-PCR | Functional MTI | 19117988 |
| MIRT002946 | hsa-miR-15a-5p | Homo sapiens | DMTF 1  | 9988  | Homo sapiens | Luciferase reporter assay//Reporter assay                            | Functional MTI | 15131085 |
| MIRT003333 | hsa-miR-15a-5p | Homo sapiens | BRCA 1  | 672   | Homo sapiens | Luciferase reporter assay                                            | Functional MTI | 19144710 |
| MIRT003334 | hsa-miR-15a-5p | Homo sapiens | AKT3    | 10000 | Homo sapiens | Luciferase reporter assay                                            | Functional MTI | 23233752 |
| MIRT003888 | hsa-miR-15a-5p | Homo sapiens | CADM 1  | 23705 | Homo sapiens | Reporter assay//qRT-PCR                                              | Functional MTI | 18362358 |
| MIRT004046 | hsa-miR-15a-5p | Homo sapiens | UCP2    | 7351  | Homo sapiens | Luciferase reporter assay//qRT-PCR                                   | Functional MTI | 21146880 |
| MIRT004275 | hsa-miR-15a-5p | Homo sapiens | VEGF A  | 7422  | Homo sapiens | ELISA//Luciferase reporter assay                                     | Functional MTI | 18320040 |
| MIRT004275 | hsa-miR-15a-5p | Homo sapiens | VEGF A  | 7422  | Homo sapiens | Luciferase reporter assay//qRT-PCR//Western blot                     | Functional MTI | 23104180 |

|            |                 |              |          |        |              |                                                                                                                                  |                |          |
|------------|-----------------|--------------|----------|--------|--------------|----------------------------------------------------------------------------------------------------------------------------------|----------------|----------|
| MIRT004275 | hsa-miR-15a-5p  | Homo sapiens | VEGF A   | 7422   | Homo sapiens | Luciferase reporter assay                                                                                                        | Functional MTI | 23233752 |
| MIRT004680 | hsa-miR-15a-5p  | Homo sapiens | TSPYL 2  | 64061  | Homo sapiens | Luciferase reporter assay                                                                                                        | Functional MTI | 19478946 |
| MIRT005552 | hsa-miR-15a-5p  | Homo sapiens | CHUK     | 1147   | Homo sapiens | Luciferase reporter assay//qRT-PCR//Western blot                                                                                 | Functional MTI | 20711193 |
| MIRT005763 | hsa-miR-15a-5p  | Homo sapiens | TP53     | 7157   | Homo sapiens | Immunoblot/Luciferase reporter assay                                                                                             | Functional MTI | 21205967 |
| MIRT006913 | hsa-miR-15a-5p  | Homo sapiens | IFNG     | 3458   | Homo sapiens | Luciferase reporter assay//qRT-PCR                                                                                               | Functional MTI | 22379033 |
| MIRT006998 | hsa-miR-15a-5p  | Homo sapiens | PURA     | 5813   | Homo sapiens | Luciferase reporter assay                                                                                                        | Functional MTI | 22835829 |
| MIRT007090 | hsa-miR-15a-5p  | Homo sapiens | RECK     | 8434   | Homo sapiens | GFP reporter assay//qRT-PCR                                                                                                      | Functional MTI | 23176145 |
| MIRT003297 | hsa-miR-186-5p  | Homo sapiens | FOXO 1   | 2308   | Homo sapiens | Immunohistochemistry//Northern blot/qRT-PCR//Western blot                                                                        | Functional MTI | 20028871 |
| MIRT004356 | hsa-miR-186-5p  | Homo sapiens | P2RX7    | 5027   | Homo sapiens | qRT-PCR//Luciferase reporter assay                                                                                               | Functional MTI | 18682393 |
| MIRT005871 | hsa-miR-186-5p  | Homo sapiens | AKAP 12  | 9590   | Homo sapiens | Immunohistochemistry//Luciferase reporter assay//Microarray//qRT-PCR//Western blot                                               | Functional MTI | 20979053 |
| MIRT007210 | hsa-miR-186-5p  | Homo sapiens | CSNK 2A1 | 1457   | Homo sapiens | Immunoblot/Luciferase reporter assay//qRT-PCR//Western blot                                                                      | Functional MTI | 23137536 |
| MIRT000480 | hsa-miR-193b-3p | Homo sapiens | CCND 1   | 595    | Homo sapiens | qRT-PCR//Luciferase reporter assay//Western blot//Microarray//Reporter assay;Western blot;qRT-PCR;Microarray;Other               | Functional MTI | 20304954 |
| MIRT000480 | hsa-miR-193b-3p | Homo sapiens | CCND 1   | 595    | Homo sapiens | Luciferase reporter assay//qRT-PCR//Western blot                                                                                 | Functional MTI | 20655737 |
| MIRT000701 | hsa-miR-193b-3p | Homo sapiens | ESR1     | 2099   | Homo sapiens | Luciferase reporter assay//Microarray                                                                                            | Functional MTI | 19684618 |
| MIRT004413 | hsa-miR-193b-3p | Homo sapiens | PLAU     | 5328   | Homo sapiens | Western blot/Luciferase reporter assay                                                                                           | Functional MTI | 19701247 |
| MIRT004414 | hsa-miR-193b-3p | Homo sapiens | PRAP1    | 118471 | Homo sapiens | Luciferase reporter assay                                                                                                        | Functional MTI | 21779487 |
| MIRT004663 | hsa-miR-193b-3p | Homo sapiens | MCL1     | 4170   | Homo sapiens | Luciferase reporter assay//Western blot                                                                                          | Functional MTI | 20103677 |
| MIRT005516 | hsa-miR-193b-3p | Homo sapiens | ETS1     | 2113   | Homo sapiens | Luciferase reporter assay//qRT-PCR//Western blot                                                                                 | Functional MTI | 20655737 |
| MIRT006983 | hsa-miR-193b-3p | Homo sapiens | YWH AZ   | 7534   | Homo sapiens | Luciferase reporter assay//Reporter assay;Proteomics                                                                             | Functional MTI | 21512034 |
| MIRT006985 | hsa-miR-193b-3p | Homo sapiens | SHMT 2   | 6472   | Homo sapiens | Luciferase reporter assay//Reporter assay;Proteomics                                                                             | Functional MTI | 21512034 |
| MIRT006986 | hsa-miR-193b-3p | Homo sapiens | AKR1 C2  | 1646   | Homo sapiens | Luciferase reporter assay//Reporter assay;Proteomics                                                                             | Functional MTI | 21512034 |
| MIRT000222 | hsa-miR-195-5p  | Homo sapiens | WEE1     | 7465   | Homo sapiens | ELISA//GFP reporter assay//Luciferase reporter assay//Microarray//qRT-PCR//Western blot                                          | Functional MTI | 19823043 |
| MIRT000223 | hsa-miR-195-5p  | Homo sapiens | E2F3     | 1871   | Homo sapiens | Immunohistochemistry//Luciferase reporter assay//Northern blot//qRT-PCR//Western blot//Reporter assay;Western blot;qRT-PCR;Other | Functional MTI | 19441017 |

|            |                |              |        |        |              |                                                                                  |                           |          |
|------------|----------------|--------------|--------|--------|--------------|----------------------------------------------------------------------------------|---------------------------|----------|
| MIRT000223 | hsa-miR-195-5p | Homo sapiens | E2F3   | 1871   | Homo sapiens | Luciferase reporter assay//Western blot                                          | Functional MTI            | 22217655 |
| MIRT000224 | hsa-miR-195-5p | Homo sapiens | CDK6   | 1021   | Homo sapiens | Reporter assay;Western blot;qRT-PCR;Other                                        | Functional MTI            | 19441017 |
| MIRT000225 | hsa-miR-195-5p | Homo sapiens | CCND1  | 595    | Homo sapiens | Luciferase reporter assay//Western blot                                          | Functional MTI            | 22217655 |
| MIRT000225 | hsa-miR-195-5p | Homo sapiens | CCND1  | 595    | Homo sapiens | Luciferase reporter assay                                                        | Functional MTI            | 23383003 |
| MIRT006246 | hsa-miR-195-5p | Homo sapiens | CCND3  | 896    | Homo sapiens | Luciferase reporter assay//Western blot                                          | Functional MTI            | 22217655 |
| MIRT006245 | hsa-miR-195-5p | Homo sapiens | TBCCD1 | 55171  | Homo sapiens | Luciferase reporter assay//Western blot                                          | Functional MTI            | 22217655 |
| MIRT006252 | hsa-miR-195-5p | Homo sapiens | CDK4   | 1019   | Homo sapiens | Luciferase reporter assay                                                        | Functional MTI            | 22289176 |
| MIRT004273 | hsa-miR-195-5p | Homo sapiens | VEGFA  | 7422   | Homo sapiens | ELISA//Luciferase reporter assay                                                 | Functional MTI            | 18320040 |
| MIRT004669 | hsa-miR-195-5p | Homo sapiens | CCL4   | 6351   | Homo sapiens | ELISA//Immunoprecipitaion//qRT-PCR//Western blot                                 | Functional MTI            | 20952681 |
| MIRT004937 | hsa-miR-195-5p | Homo sapiens | KRT7   | 3855   | Homo sapiens | Immunoblot//qRT-PCR                                                              | Non-Functional MTI (Weak) | 19378336 |
| MIRT005362 | hsa-miR-195-5p | Homo sapiens | BCL2   | 596    | Homo sapiens | Luciferase reporter assay//qRT-PCR//Western blot                                 | Functional MTI            | 20727858 |
| MIRT006235 | hsa-miR-195-5p | Homo sapiens | SLC2A3 | 6515   | Homo sapiens | Luciferase reporter assay//Western blot                                          | Functional MTI            | 22265971 |
| MIRT006995 | hsa-miR-195-5p | Homo sapiens | CDC42  | 998    | Homo sapiens | Luciferase reporter assay                                                        | Functional MTI            | 22802111 |
| MIRT007054 | hsa-miR-195-5p | Homo sapiens | CAB39  | 51719  | Homo sapiens | Immunocytochemistry//In situ hybridization//Northern blot//qRT-PCR//Western blot | Functional MTI            | 22844503 |
| MIRT007169 | hsa-miR-195-5p | Homo sapiens | CHUK   | 1147   | Homo sapiens | Luciferase reporter assay                                                        | Functional MTI            | 23487264 |
| MIRT007170 | hsa-miR-195-5p | Homo sapiens | TAB3   | 257397 | Homo sapiens | Luciferase reporter assay                                                        | Functional MTI            | 23487264 |
| MIRT007219 | hsa-miR-195-5p | Homo sapiens | MBD1   | 4152   | Homo sapiens | Luciferase reporter assay                                                        | Functional MTI            | 23349673 |
| MIRT007237 | hsa-miR-195-5p | Homo sapiens | CCNE1  | 898    | Homo sapiens | Luciferase reporter assay                                                        | Functional MTI            | 23383003 |
| MIRT007370 | hsa-miR-195-5p | Homo sapiens | BCL2L2 | 599    | Homo sapiens | Luciferase reporter assay//Western blot                                          | Functional MTI            | 23526568 |
| MIRT000018 | hsa-miR-222-3p | Homo sapiens | STAT5A | 6776   | Homo sapiens | qRT-PCR//Luciferase reporter assay//Western blot                                 | Functional MTI            | 20489169 |
| MIRT000131 | hsa-miR-222-3p | Homo sapiens | CDKN1B | 1027   | Homo sapiens | Luciferase reporter assay//Western blot//Western blot;Other//Northern blot       | Functional MTI            | 17569667 |
| MIRT000131 | hsa-miR-222-3p | Homo sapiens | CDKN1B | 1027   | Homo sapiens | qRT-PCR//Luciferase reporter assay//Western blot                                 | Functional MTI            | 19153141 |
| MIRT000131 | hsa-miR-222-3p | Homo sapiens | CDKN1B | 1027   | Homo sapiens | Western blot//Northern blot                                                      | Functional MTI            | 19107213 |
| MIRT000131 | hsa-miR-222-3p | Homo sapiens | CDKN1B | 1027   | Homo sapiens | Luciferase reporter assay//Western blot                                          | Functional MTI            | 19859555 |

|            |                |              |        |       |              |                                                                                                                                  |                |          |
|------------|----------------|--------------|--------|-------|--------------|----------------------------------------------------------------------------------------------------------------------------------|----------------|----------|
| MIRT000131 | hsa-miR-222-3p | Homo sapiens | CDKN1B | 1027  | Homo sapiens | Luciferase reporter assay//qRT-PCR//Western blot                                                                                 | Functional MTI | 18417445 |
| MIRT000131 | hsa-miR-222-3p | Homo sapiens | CDKN1B | 1027  | Homo sapiens | Luciferase reporter assay                                                                                                        | Functional MTI | 19150885 |
| MIRT000131 | hsa-miR-222-3p | Homo sapiens | CDKN1B | 1027  | Homo sapiens | Luciferase reporter assay                                                                                                        | Functional MTI | 18983236 |
| MIRT000131 | hsa-miR-222-3p | Homo sapiens | CDKN1B | 1027  | Homo sapiens | Luciferase reporter assay                                                                                                        | Functional MTI | 18246122 |
| MIRT000131 | hsa-miR-222-3p | Homo sapiens | CDKN1B | 1027  | Homo sapiens | Northern blot//qRT-PCR//Western blot                                                                                             | Functional MTI | 20018759 |
| MIRT000131 | hsa-miR-222-3p | Homo sapiens | CDKN1B | 1027  | Homo sapiens | Immunohistochemistry//In situ hybridization//Luciferase reporter assay//Northern blot//Western blot//Reporter assay;Western blot | Functional MTI | 19424584 |
| MIRT000131 | hsa-miR-222-3p | Homo sapiens | CDKN1B | 1027  | Homo sapiens | Western blot//Reporter assay                                                                                                     | Functional MTI | 17721077 |
| MIRT000131 | hsa-miR-222-3p | Homo sapiens | CDKN1B | 1027  | Homo sapiens | Luciferase reporter assay                                                                                                        | Functional MTI | 17627278 |
| MIRT000131 | hsa-miR-222-3p | Homo sapiens | CDKN1B | 1027  | Homo sapiens | qRT-PCR//Western blot                                                                                                            | Functional MTI | 18708351 |
| MIRT000131 | hsa-miR-222-3p | Homo sapiens | CDKN1B | 1027  | Homo sapiens | Reporter assay                                                                                                                   | Functional MTI | 17914108 |
| MIRT000131 | hsa-miR-222-3p | Homo sapiens | CDKN1B | 1027  | Homo sapiens | Reporter assay                                                                                                                   | Functional MTI | 18413744 |
| MIRT000135 | hsa-miR-222-3p | Homo sapiens | SOD2   | 6648  | Homo sapiens | Flow//Luciferase reporter assay//Microarray//qRT-PCR//Western blot                                                               | Functional MTI | 19487542 |
| MIRT000136 | hsa-miR-222-3p | Homo sapiens | MMP1   | 4312  | Homo sapiens | Flow//Luciferase reporter assay//Microarray//qRT-PCR//Western blot                                                               | Functional MTI | 19487542 |
| MIRT000433 | hsa-miR-222-3p | Homo sapiens | FOXO3  | 2309  | Homo sapiens | qRT-PCR//ChIP//Luciferase reporter assay//Western blot//Northern blot                                                            | Functional MTI | 20388878 |
| MIRT006377 | hsa-miR-222-3p | Homo sapiens | DICER1 | 23405 | Homo sapiens | Luciferase reporter assay                                                                                                        | Functional MTI | 21761362 |
| MIRT000719 | hsa-miR-222-3p | Homo sapiens | CDKN1C | 1028  | Homo sapiens | qRT-PCR//Luciferase reporter assay//Western blot                                                                                 | Functional MTI | 19153141 |
| MIRT000719 | hsa-miR-222-3p | Homo sapiens | CDKN1C | 1028  | Homo sapiens | Luciferase reporter assay//Western blot                                                                                          | Functional MTI | 19589872 |
| MIRT000719 | hsa-miR-222-3p | Homo sapiens | CDKN1C | 1028  | Homo sapiens | Luciferase reporter assay//Reporter assay;Other                                                                                  | Functional MTI | 18413744 |
| MIRT001779 | hsa-miR-222-3p | Homo sapiens | KIT    | 3815  | Homo sapiens | qRT-PCR//Western blot                                                                                                            | Functional MTI | 18417445 |
| MIRT001779 | hsa-miR-222-3p | Homo sapiens | KIT    | 3815  | Homo sapiens | Luciferase reporter assay                                                                                                        | Functional MTI | 18246122 |
| MIRT001779 | hsa-miR-222-3p | Homo sapiens | KIT    | 3815  | Homo sapiens | Luciferase reporter assay                                                                                                        | Functional MTI | 18983236 |
| MIRT001779 | hsa-miR-222-3p | Homo sapiens | KIT    | 3815  | Homo sapiens | Northern blot//qRT-PCR//Western blot                                                                                             | Functional MTI | 16365291 |
| MIRT001779 | hsa-miR-222-3p | Homo sapiens | KIT    | 3815  | Homo sapiens | Reporter assay                                                                                                                   | Functional MTI | 16330772 |
| MIRT002334 | hsa-miR-       | Homo         | TMED   | 51014 | Homo         | Western blot                                                                                                                     | Functional MTI | 21226887 |

|            |                |              |         |       |              |                                                                                                     |                |          |
|------------|----------------|--------------|---------|-------|--------------|-----------------------------------------------------------------------------------------------------|----------------|----------|
|            | 222-3p         | sapiens      | 7       |       | sapiens      |                                                                                                     |                |          |
| MIRT002334 | hsa-miR-222-3p | Homo sapiens | TMED7   | 51014 | Homo sapiens | Western blot;qRT-PCR                                                                                | Functional MTI | 20018759 |
| MIRT006064 | hsa-miR-222-3p | Homo sapiens | ETS1    | 2113  | Homo sapiens | Luciferase reporter assay//qRT-PCR                                                                  | Functional MTI | 23522449 |
| MIRT003191 | hsa-miR-222-3p | Homo sapiens | PPP2R2A | 5520  | Homo sapiens | Luciferase reporter assay//Western blot                                                             | Functional MTI | 20103675 |
| MIRT003191 | hsa-miR-222-3p | Homo sapiens | PPP2R2A | 5520  | Homo sapiens | Reporter assay;Western blot                                                                         | Functional MTI | 21656127 |
| MIRT003451 | hsa-miR-222-3p | Homo sapiens | TIMP3   | 7078  | Homo sapiens | Flow//Immunohistochemistry//Luciferase reporter assay//qRT-PCR//Western blot                        | Functional MTI | 19962668 |
| MIRT003451 | hsa-miR-222-3p | Homo sapiens | TIMP3   | 7078  | Homo sapiens | Immunohistochemistry//In situ hybridization//qRT-PCR//Western blot                                  | Functional MTI | 22009755 |
| MIRT003451 | hsa-miR-222-3p | Homo sapiens | TIMP3   | 7078  | Homo sapiens | ELISA//Luciferase reporter assay//qRT-PCR//Western blot                                             | Functional MTI | 22681957 |
| MIRT003756 | hsa-miR-222-3p | Homo sapiens | TNFSF10 | 8743  | Homo sapiens | Western blot                                                                                        | Functional MTI | 18246122 |
| MIRT004485 | hsa-miR-222-3p | Homo sapiens | FOS     | 2353  | Homo sapiens | qRT-PCR//Luciferase reporter assay//Western blot//Northern blot                                     | Functional MTI | 20299489 |
| MIRT004485 | hsa-miR-222-3p | Homo sapiens | FOS     | 2353  | Homo sapiens | Luciferase reporter assay                                                                           | Functional MTI | 23400877 |
| MIRT005321 | hsa-miR-222-3p | Homo sapiens | ESR1    | 2099  | Homo sapiens | Luciferase reporter assay//qRT-PCR//Western blot                                                    | Functional MTI | 18790736 |
| MIRT005369 | hsa-miR-222-3p | Homo sapiens | BBC3    | 27113 | Homo sapiens | Immunohistochemistry//In situ hybridization//Luciferase reporter assay//Northern blot//Western blot | Functional MTI | 20813046 |
| MIRT005586 | hsa-miR-222-3p | Homo sapiens | PTEN    | 5728  | Homo sapiens | FACS//Flow//Luciferase reporter assay//Northern blot//Western blot                                  | Functional MTI | 20618998 |
| MIRT005586 | hsa-miR-222-3p | Homo sapiens | PTEN    | 5728  | Homo sapiens | Flow//Immunohistochemistry//Luciferase reporter assay//qRT-PCR//Western blot                        | Functional MTI | 19962668 |
| MIRT005586 | hsa-miR-222-3p | Homo sapiens | PTEN    | 5728  | Homo sapiens | Western blot                                                                                        | Functional MTI | 23028614 |
| MIRT005791 | hsa-miR-222-3p | Homo sapiens | CORO1A  | 11151 | Homo sapiens | Western blot                                                                                        | Functional MTI | 21226887 |
| MIRT005792 | hsa-miR-222-3p | Homo sapiens | TCEAL1  | 9338  | Homo sapiens | Western blot                                                                                        | Functional MTI | 21226887 |
| MIRT006728 | hsa-miR-222-3p | Homo sapiens | RECK    | 8434  | Homo sapiens | Luciferase reporter assay                                                                           | Functional MTI | 22321642 |
| MIRT006918 | hsa-miR-222-3p | Homo sapiens | CERS2   | 29956 | Homo sapiens | Luciferase reporter assay//qRT-PCR//Western blot                                                    | Functional MTI | 22393241 |
| MIRT000109 | hsa-miR-26a-5p | Homo sapiens | HMGA2   | 8091  | Homo sapiens | Luciferase reporter assay                                                                           | Functional MTI | 17563749 |
| MIRT000110 | hsa-miR-26a-5p | Homo sapiens | HMGA1   | 3159  | Homo sapiens | Luciferase reporter assay                                                                           | Functional MTI | 17563749 |
| MIRT000110 | hsa-miR-26a-5p | Homo sapiens | HMGA1   | 3159  | Homo sapiens | Luciferase reporter assay//Western blot                                                             | Functional MTI | 22245693 |
| MIRT000111 | hsa-miR-26a-5p | Homo sapiens | CCNE2   | 9134  | Homo sapiens | Luciferase reporter assay//Western blot                                                             | Functional MTI | 19524505 |

|            |                |              |        |       |              |                                                                        |                           |          |
|------------|----------------|--------------|--------|-------|--------------|------------------------------------------------------------------------|---------------------------|----------|
| MIRT000112 | hsa-miR-26a-5p | Homo sapiens | CCND2  | 894   | Homo sapiens | Luciferase reporter assay//Western blot                                | Functional MTI            | 19524505 |
| MIRT006389 | hsa-miR-26a-5p | Homo sapiens | ESR1   | 2099  | Homo sapiens | Luciferase reporter assay                                              | Functional MTI            | 21610700 |
| MIRT006306 | hsa-miR-26a-5p | Homo sapiens | CDK6   | 1021  | Homo sapiens | Luciferase reporter assay//Western blot                                | Functional MTI            | 22210897 |
| MIRT001039 | hsa-miR-26a-5p | Homo sapiens | LIF    | 3976  | Homo sapiens | ELISA                                                                  | Non-Functional MTI (Weak) | 19011087 |
| MIRT001095 | hsa-miR-26a-5p | Homo sapiens | PTEN   | 5728  | Homo sapiens | Western blot//Luciferase reporter assay                                | Functional MTI            | 19487573 |
| MIRT001095 | hsa-miR-26a-5p | Homo sapiens | PTEN   | 5728  | Homo sapiens | Luciferase reporter assay//Western blot                                | Functional MTI            | 20216554 |
| MIRT001095 | hsa-miR-26a-5p | Homo sapiens | PTEN   | 5728  | Homo sapiens | GFP reporter assay//Luciferase reporter assay//Western blot            | Functional MTI            | 20080666 |
| MIRT001771 | hsa-miR-26a-5p | Homo sapiens | EZH2   | 2146  | Homo sapiens | Luciferase reporter assay//Western blot                                | Functional MTI            | 18713946 |
| MIRT001771 | hsa-miR-26a-5p | Homo sapiens | EZH2   | 2146  | Homo sapiens | Luciferase reporter assay//qRT-PCR//Western blot                       | Functional MTI            | 20478051 |
| MIRT001771 | hsa-miR-26a-5p | Homo sapiens | EZH2   | 2146  | Homo sapiens | Immunohistochemistry//qRT-PCR//Western blot                            | Functional MTI            | 21199804 |
| MIRT001771 | hsa-miR-26a-5p | Homo sapiens | EZH2   | 2146  | Homo sapiens | Immunohistochemistry//Luciferase reporter assay//qRT-PCR//Western blot | Functional MTI            | 20952513 |
| MIRT001771 | hsa-miR-26a-5p | Homo sapiens | EZH2   | 2146  | Homo sapiens | Reporter assay                                                         | Functional MTI            | 18281287 |
| MIRT001772 | hsa-miR-26a-5p | Homo sapiens | PLAG1  | 5324  | Homo sapiens | Luciferase reporter assay//Microarray//Reporter assay;Other            | Functional MTI            | 16461460 |
| MIRT002315 | hsa-miR-26a-5p | Homo sapiens | SERBP1 | 26135 | Homo sapiens | Immunoprecipitation//Luciferase reporter assay//Western blot           | Functional MTI            | 17637574 |
| MIRT002340 | hsa-miR-26a-5p | Homo sapiens | SMAD1  | 4086  | Homo sapiens | Western blot                                                           | Functional MTI            | 20857419 |
| MIRT002340 | hsa-miR-26a-5p | Homo sapiens | SMAD1  | 4086  | Homo sapiens | RNase mapping analysis//Western blot//Reporter assay                   | Functional MTI            | 17922609 |
| MIRT002340 | hsa-miR-26a-5p | Homo sapiens | SMAD1  | 4086  | Homo sapiens | Luciferase reporter assay                                              | Functional MTI            | 14697198 |
| MIRT002340 | hsa-miR-26a-5p | Homo sapiens | SMAD1  | 4086  | Homo sapiens | Luciferase reporter assay//Western blot//Reporter assay                | Functional MTI            | 18197755 |
| MIRT002340 | hsa-miR-26a-5p | Homo sapiens | SMAD1  | 4086  | Homo sapiens | Luciferase reporter assay                                              | Functional MTI            | 23028144 |
| MIRT003213 | hsa-miR-26a-5p | Homo sapiens | RB1    | 5925  | Homo sapiens | GFP reporter assay//Luciferase reporter assay//Western blot            | Functional MTI            | 20080666 |
| MIRT003213 | hsa-miR-26a-5p | Homo sapiens | RB1    | 5925  | Homo sapiens | Luciferase reporter assay//Microarray//qRT-PCR//Western blot           | Functional MTI            | 23108995 |
| MIRT003212 | hsa-miR-26a-5p | Homo sapiens | MAP3K2 | 10746 | Homo sapiens | GFP reporter assay//Luciferase reporter assay//Western blot            | Functional MTI            | 20080666 |
| MIRT006309 | hsa-miR-26a-5p | Homo sapiens | CCNE1  | 898   | Homo sapiens | Luciferase reporter assay//Western blot                                | Functional MTI            | 22210897 |
| MIRT003803 | hsa-miR-26a-5p | Homo sapiens | SMAD4  | 4089  | Homo sapiens | Western blot                                                           | Functional MTI            | 20857419 |

|            |                |              |        |        |              |                                                                                                            |                |          |
|------------|----------------|--------------|--------|--------|--------------|------------------------------------------------------------------------------------------------------------|----------------|----------|
| MIRT003803 | hsa-miR-26a-5p | Homo sapiens | SMAD 4 | 4089   | Homo sapiens | Luciferase reporter assay                                                                                  | Functional MTI | 23028144 |
| MIRT004615 | hsa-miR-26a-5p | Homo sapiens | IFNB1  | 3456   | Homo sapiens | ELISA//Luciferase reporter assay//qRT-PCR                                                                  | Functional MTI | 20130213 |
| MIRT004676 | hsa-miR-26a-5p | Homo sapiens | GSK3 B | 2932   | Homo sapiens | Luciferase reporter assay//Microarray//qRT-PCR//Western blot                                               | Functional MTI | 20525681 |
| MIRT005587 | hsa-miR-26a-5p | Homo sapiens | CPEB2  | 132864 | Homo sapiens | Luciferase reporter assay//Northern blot//qRT-PCR                                                          | Functional MTI | 20660482 |
| MIRT005588 | hsa-miR-26a-5p | Homo sapiens | CPEB3  | 22849  | Homo sapiens | Luciferase reporter assay//Northern blot//qRT-PCR                                                          | Functional MTI | 20660482 |
| MIRT005589 | hsa-miR-26a-5p | Homo sapiens | CPEB4  | 80315  | Homo sapiens | Luciferase reporter assay//Northern blot//qRT-PCR                                                          | Functional MTI | 20660482 |
| MIRT005751 | hsa-miR-26a-5p | Homo sapiens | GDAP 1 | 54332  | Homo sapiens | Immunofluorescence//In situ hybridization//Luciferase reporter assay//Northern blot//qRT-PCR//Western blot | Functional MTI | 20827281 |
| MIRT005920 | hsa-miR-26a-5p | Homo sapiens | MTDH   | 92140  | Homo sapiens | Immunohistochemistry//Luciferase reporter assay//qRT-PCR//Western blot                                     | Functional MTI | 20952513 |
| MIRT006711 | hsa-miR-26a-5p | Homo sapiens | ABCA 1 | 19     | Homo sapiens | Immunoblot//Luciferase reporter assay//qRT-PCR                                                             | Functional MTI | 22673513 |
| MIRT006712 | hsa-miR-26a-5p | Homo sapiens | ARL4 C | 10123  | Homo sapiens | Immunoblot//Luciferase reporter assay//qRT-PCR                                                             | Functional MTI | 22673513 |
| MIRT007347 | hsa-miR-26a-5p | Homo sapiens | NOS2   | 4843   | Homo sapiens | qRT-PCR//Western blot                                                                                      | Functional MTI | 23338972 |
| MIRT007374 | hsa-miR-26a-5p | Homo sapiens | IL6    | 3569   | Homo sapiens | Luciferase reporter assay                                                                                  | Functional MTI | 23389848 |
| MIRT052649 | hsa-miR-26a-5p | Homo sapiens | MCL1   | 4170   | Homo sapiens | Western blot                                                                                               | Functional MTI | 23750239 |
| MIRT005458 | hsa-miR-340-5p | Homo sapiens | MET    | 4233   | Homo sapiens | Immunohistochemistry//Luciferase reporter assay//qRT-PCR//Western blot                                     | Functional MTI | 21225860 |
| MIRT006217 | hsa-miR-483-5p | Homo sapiens | MAPK 3 | 5595   | Homo sapiens | Luciferase reporter assay//Microarray//qRT-PCR//Western blot                                               | Functional MTI | 22465663 |
| MIRT004118 | hsa-miR-483-3p | Homo sapiens | SMAD 4 | 4089   | Homo sapiens | Luciferase reporter assay//qRT-PCR//Western blot                                                           | Functional MTI | 21112326 |
| MIRT004500 | hsa-miR-483-3p | Homo sapiens | BBC3   | 27113  | Homo sapiens | qRT-PCR//Luciferase reporter assay//Western blot//Northern blot                                            | Functional MTI | 20388800 |
| MIRT006686 | hsa-miR-483-3p | Homo sapiens | PARD 3 | 56288  | Homo sapiens | qRT-PCR//Western blot                                                                                      | Functional MTI | 22101077 |
| MIRT005774 | hsa-miR-616-3p | Homo sapiens | TFPI2  | 7980   | Homo sapiens | In situ hybridization//Luciferase reporter assay//Microarray//qRT-PCR                                      | Functional MTI | 21224345 |
| MIRT007325 | hsa-miR-616-3p | Homo sapiens | PON1   | 5444   | Homo sapiens | Luciferase reporter assay                                                                                  | Functional MTI | 23497787 |
| MIRT000448 | hsa-miR-650    | Homo sapiens | ING4   | 51147  | Homo sapiens | Luciferase reporter assay//qRT-PCR//Western blot                                                           | Functional MTI | 20381459 |
